# Supplementary material
Source: Springer Nature journal article supplement (https://www.springermedizin.de/resource/supplementary/13047_2013_574_MOESM1_ESM.pdf/9664000)

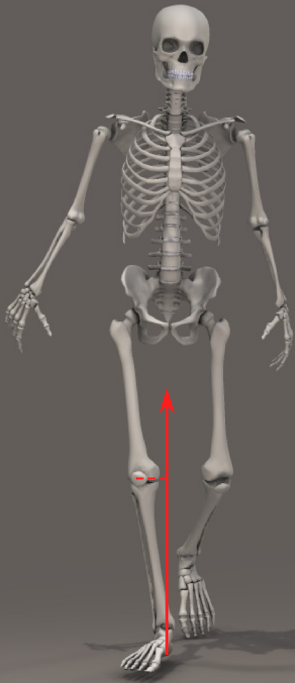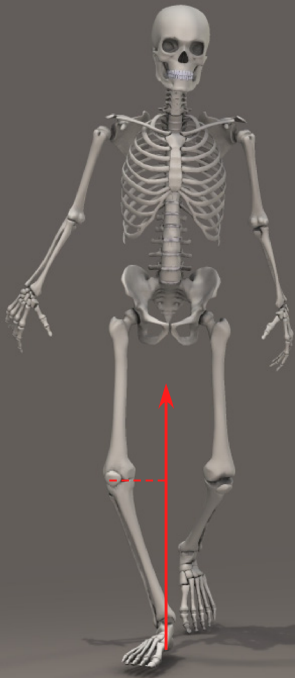

Supplement: MOESM1 [file 9664000]
